# Supplementary material
Source: PubMed Central journal article supplement (PMC4222994)
Supplement: NIHMS611388-supplement-Supp_FigureS1-S7___TableS1-S2.pdf [file NIHMS611388-supplement-Supp_FigureS1-S7___TableS1-S2.pdf]

# Supplementary Fig.1

## Top

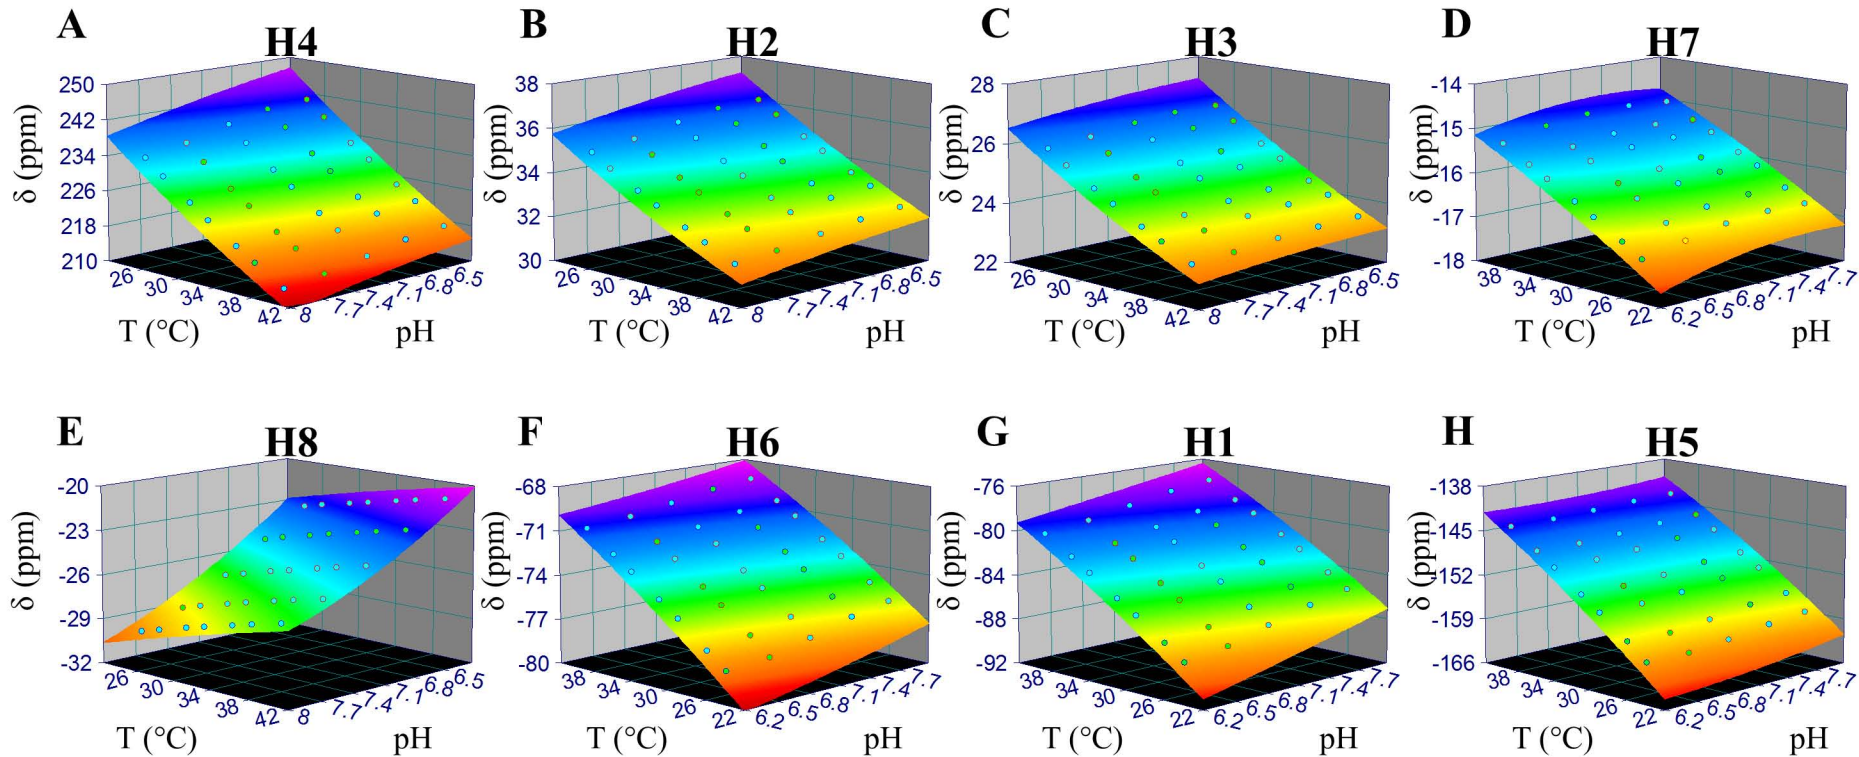

**Supplementary Fig.2****Top**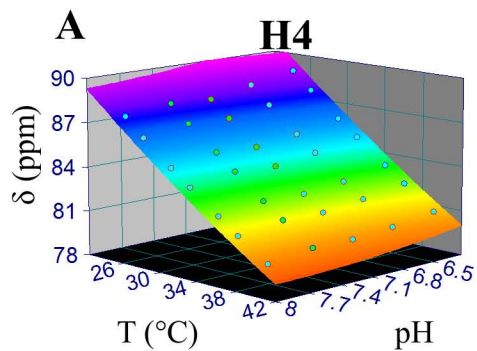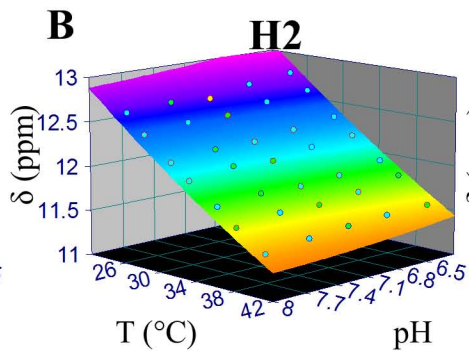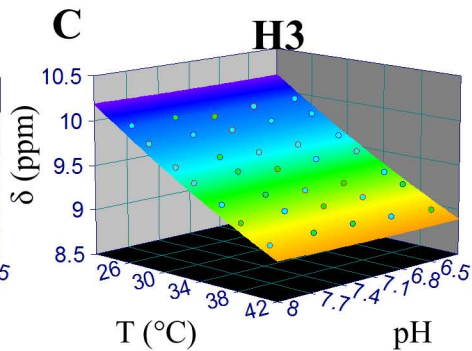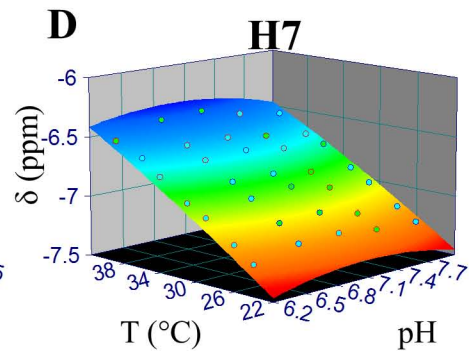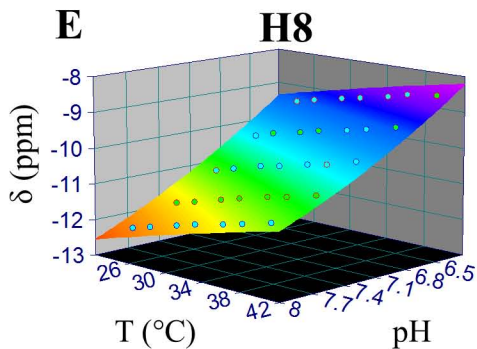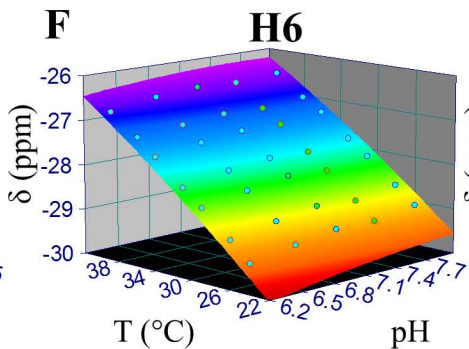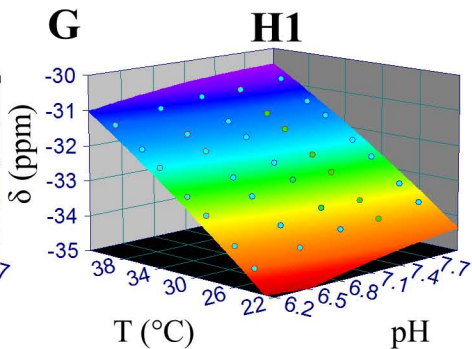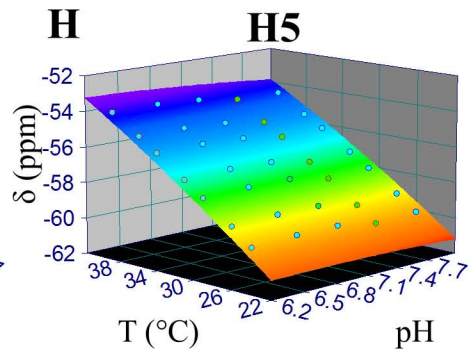

# Supplementary Fig.3 Top

## A Tm-DOTA-4AmP<sup>5-</sup>

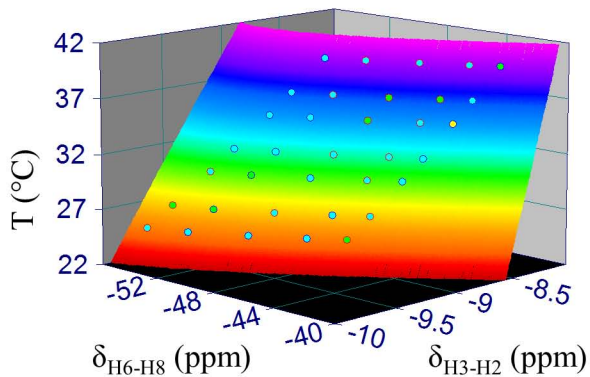

## B Tm-DOTA-4AmP<sup>5-</sup>

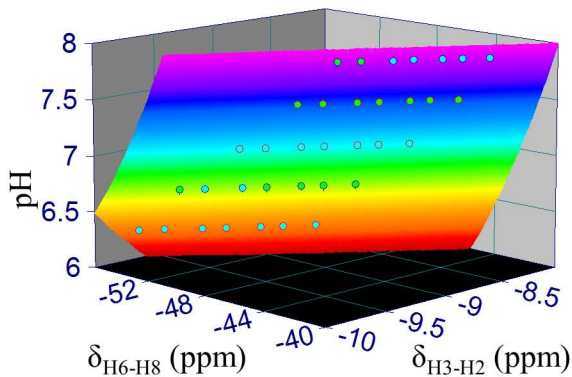

## C Yb-DOTA-4AmP<sup>5-</sup>

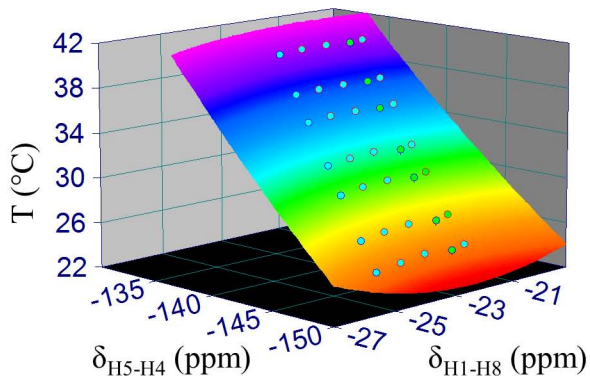

## D Yb-DOTA-4AmP<sup>5-</sup>

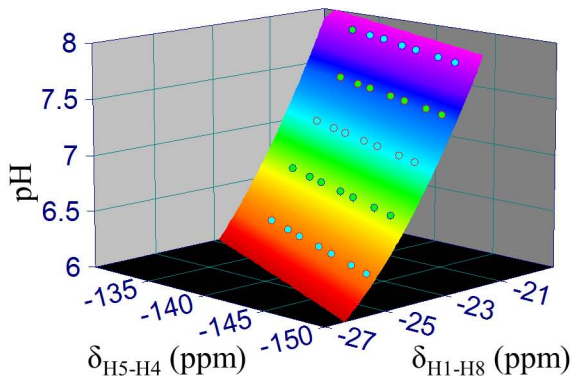

**Supplementary Fig.4****Top**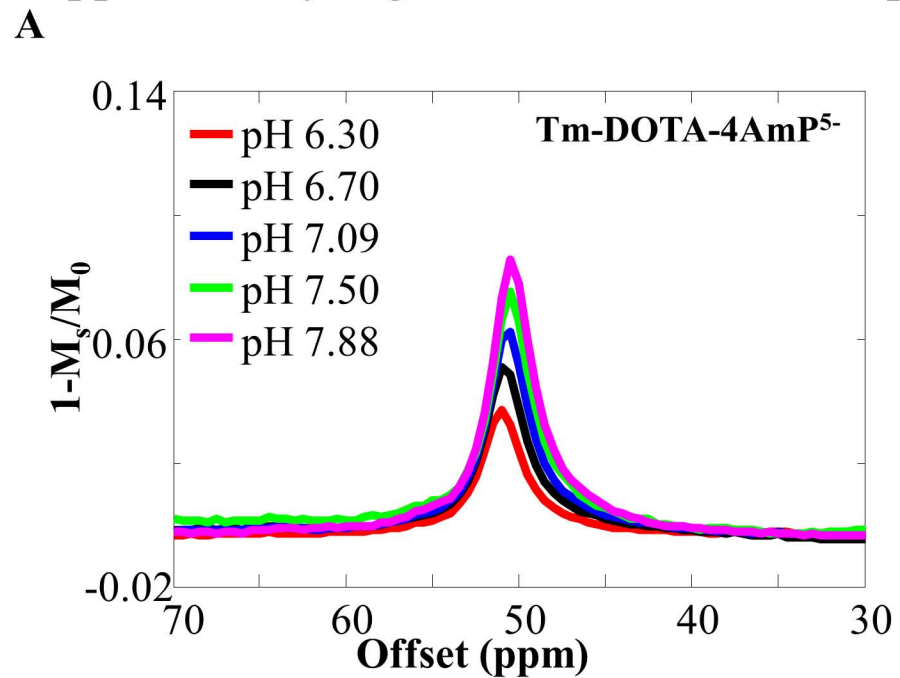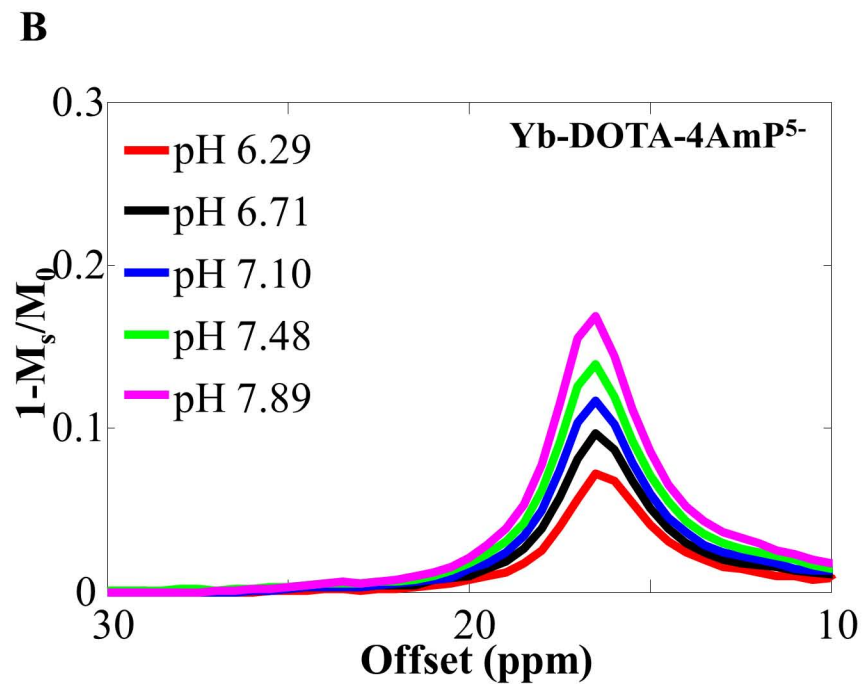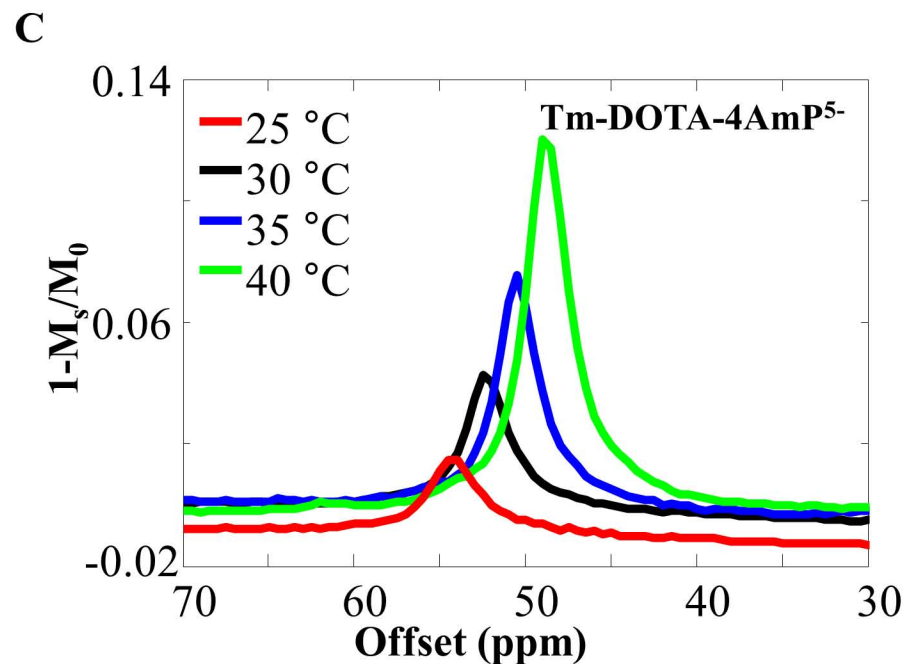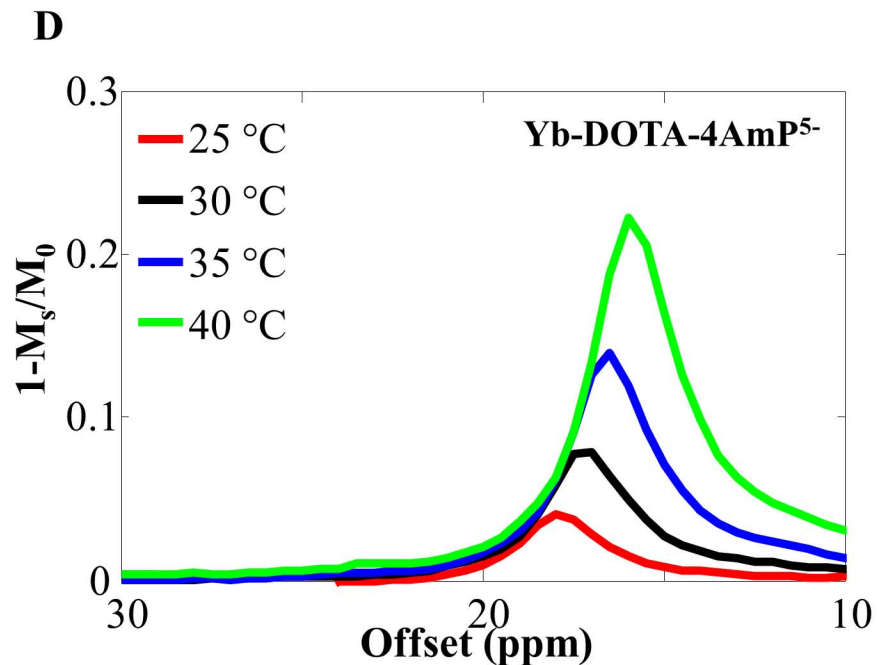

# Supplementary Fig.5

Top

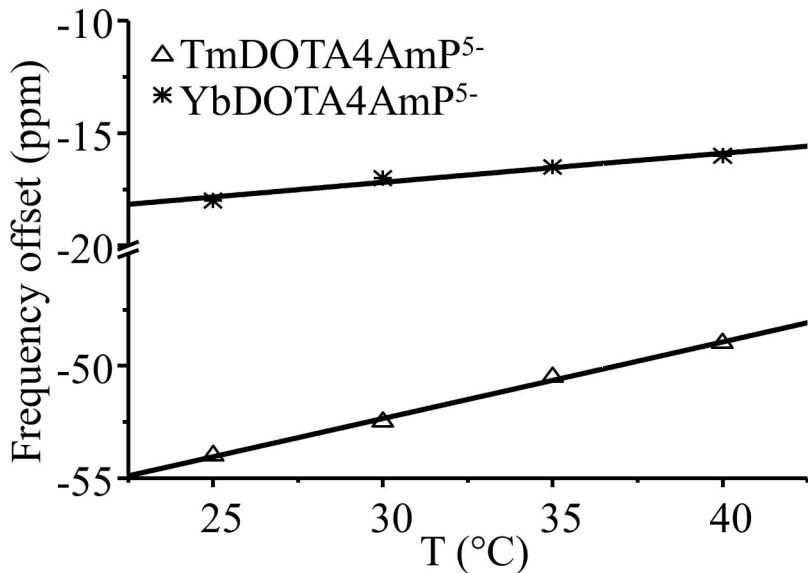

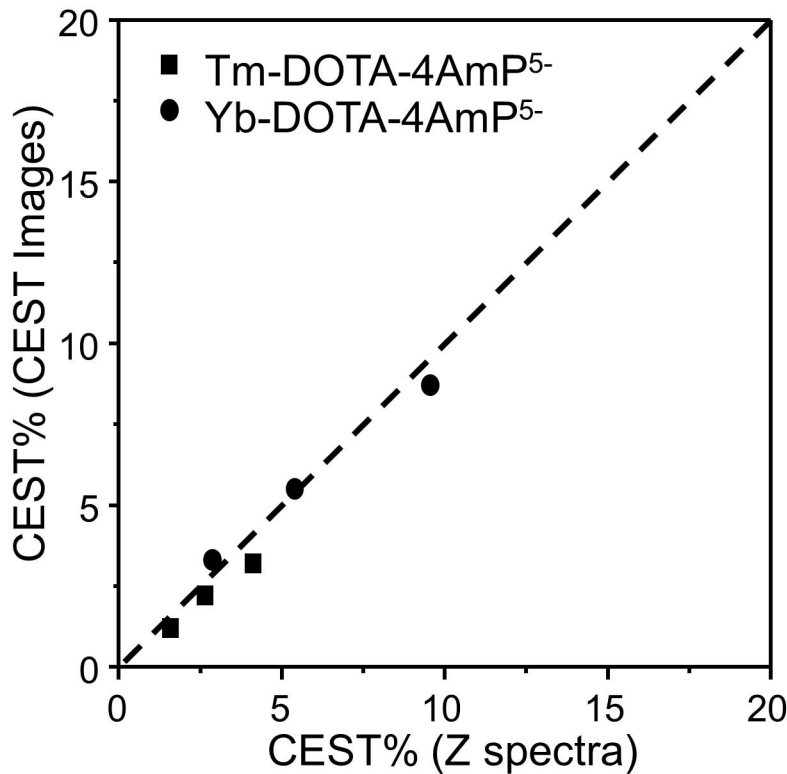

# Supplementary Fig.7

# Top

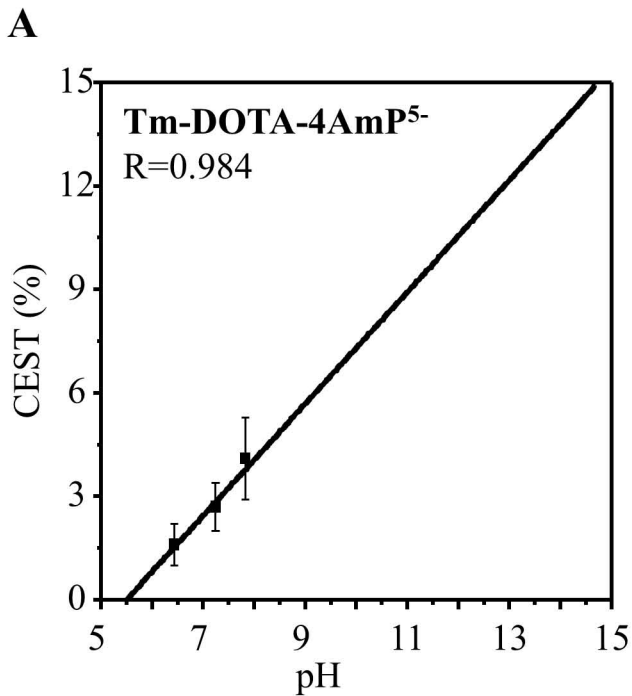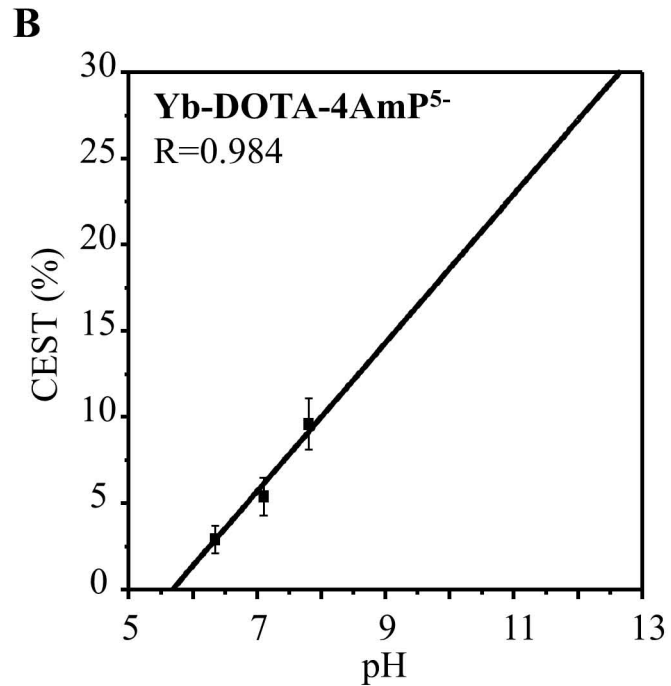

**Supplementary Table 1. Coefficients for T and pH dependence of chemical shift in <sup>1</sup>H resonances of Tm-DOTA-4AmP<sup>5-</sup>**

| <b>Resonance</b> | <b>a</b> | <b>b</b> | <b>c</b> | <b>d</b> | <b>e</b>  | <b>f</b> | <b>r<sup>2</sup></b> |
|------------------|----------|----------|----------|----------|-----------|----------|----------------------|
| H4               | 306.469  | 1.854    | -2.930   | -0.617   | 0.0123    | 0.0856   | 0.999                |
| H2               | 46.149   | 0.583    | -0.498   | -0.121   | 0.00228   | 0.0144   | 0.999                |
| H3               | 31.901   | 0.895    | -0.383   | -0.106   | 0.00185   | 0.0100   | 0.999                |
| H7               | -36.648  | 4.0964   | 0.210    | -0.262   | -0.000912 | -0.00393 | 0.999                |
| H8               | 40.928   | -15.732  | 0.0702   | 0.769    | -0.00115  | 0.023    | 0.998                |
| -NH              | -56.849  | -3.398   | 0.690    | 0.312    | -0.00294  | -0.0192  | 0.999                |
| H6               | -100.557 | 0.0123   | 0.913    | 0.150    | -0.00373  | -0.0268  | 0.999                |
| H1               | -123.486 | 2.143    | 1.065    | 0.0585   | -0.00425  | -0.0330  | 0.999                |
| H5               | -186.904 | -4.849   | 1.954    | 0.536    | -0.00821  | -0.0513  | 0.999                |
| H3-H2            | -14.249  | 0.312    | 0.115    | 0.015    | -0.000429 | -0.00441 | 0.997                |
| H6-H8            | -141.485 | 15.744   | 0.843    | -0.619   | -0.00258  | -0.0498  | 0.997                |



**Supplementary Table 2. Coefficients for T and pH dependence of chemical shift in <sup>1</sup>H resonances of Yb-DOTA-4AmP<sup>5-</sup>**

| <b>Resonance</b> | <b>a</b> | <b>b</b> | <b>c</b> | <b>d</b> | <b>e</b>  | <b>f</b> | <b>r<sup>2</sup></b> |
|------------------|----------|----------|----------|----------|-----------|----------|----------------------|
| H4               | 128.566  | -5.396   | -0.903   | 0.292    | 0.00391   | 0.0181   | 0.998                |
| H2               | 17.793   | -0.545   | -0.135   | 0.0279   | 0.000657  | 0.00174  | 0.997                |
| H3               | 12.754   | -0.177   | -0.103   | 0.0117   | 0.000550  | 0.000643 | 0.997                |
| H7               | -15.870  | 1.955    | 0.0843   | -0.135   | -0.000334 | -0.00169 | 0.994                |
| H8               | 13.972   | -5.643   | 0.0352   | 0.261    | -0.000382 | 0.00754  | 0.997                |
| H6               | -42.246  | 1.713    | 0.301    | -0.0914  | -0.00126  | -0.00663 | 0.998                |
| H1               | -51.937  | 2.555    | 0.358    | -0.132   | -0.00145  | -0.00890 | 0.998                |
| H5               | -78.871  | 1.887    | 0.631    | -0.125   | -0.00277  | -0.0112  | 0.997                |
| H1-H8            | -65.909  | 8.198    | 0.323    | -0.393   | -0.00107  | -0.0164  | 0.999                |
| H5-H4            | -207.442 | 7.282    | 1.535    | -0.417   | -0.00668  | -0.0293  | 0.998                |
